# Supplementary material for: Differences of Pine Wood Nematode (Bursaphelenchus xylophilus) Developmental Stages under High-Osmotic-Pressure Stress
Source: MDPI journal article supplement (doi:10.3390/biology13020123), 2024-02-16
Supplement: s1 [file s1]

# Differences of Pine Wood Nematode(*Bursaphelenchus xylophilus*) Developmental Stages Under High-Osmotic-Pressure Stress

Shuting Wang<sup>1,†</sup>, Qiaoli Chen<sup>1,2,†,\*</sup>, and Feng Wang<sup>1,2,\*3</sup>

<sup>1</sup> Key Laboratory of Alien Forest Pests Monitoring and Control-Heilongjiang Province, School of Forestry, Northeast Forestry University, Harbin 150040, China; 1639788062@nefu.edu.cn (S.W.)

<sup>2</sup> Key Laboratory of Sustainable Forest Ecosystem Management-Ministry of Education, Northeast Forestry University, Harbin 150040, China; fengwang@nefu.edu.cn (F.W.)

<sup>3</sup> State Key Laboratory of Tree Genetics and Breeding, Northeast Forestry University, Harbin 150040, China; fengwang@nefu.edu.cn (F.W.)

\* Correspondence: qiaolichen@nefu.edu.cn (Q.C.); fengwang@nefu.edu.cn (F.W.)

† These authors contributed equally to this work.

Table S1. The primers used in this study.

| Gene                                  | Primer                       |
|---------------------------------------|------------------------------|
| <i>acetyl-coenzyme a synthetase 2</i> | F-`TGGACGACCTCATGAACGTG`     |
|                                       | R-`CAAAGGCGTATGGGGAATGC`     |
| <i>acetyl-coenzyme a cytoplasmic</i>  | F-`TCATACCGTCGTCTTTGCCG`     |
|                                       | R-`GAGTCCGGGCTTGGATCATT`     |
| <i>acetate--CoA ligase</i>            | F-`TTGGCAGGTCGTCGAAAAGT`     |
|                                       | R-`TGTCAGGGAAACCCATCAGC`     |
| <i>AKT-1 protein</i>                  | F-`CTTCAACGATGCAAGCACCC`     |
|                                       | R-`AACATAGCCGATCCACCGTC`     |
| <i>18S ribosomal RNA</i>              | F-`CGAAGACGATCAGATACCGTCCTA` |
|                                       | R-`TTTCTCATAAGGTGCTGGCGGAGT` |

Table S2. Body length changes of PWN at different developmental stages after high osmotic pressure treatment.

| Treatment time<br>(hour) | Developmental stage | Length of control group<br>( $\mu\text{m}$ ) | Minimum length<br>( $\mu\text{m}$ ) | Body length change rate |
|--------------------------|---------------------|----------------------------------------------|-------------------------------------|-------------------------|
| 6                        | J2                  | $312.93 \pm 5.59$                            | $271.53 \pm 6.19$                   | 13.23%                  |
|                          |                     | (307.34~318.52)                              | (277.72~265.34)                     |                         |
|                          | J3                  | $428.26 \pm 7.86$                            | $369.79 \pm 4.23$                   | 13.65%                  |
|                          |                     | (436.12~420.40)                              | (374.09~365.49)                     |                         |
|                          | J4                  | $526.51 \pm 7.27$                            | $457.99 \pm 8.30$                   | 13.02%                  |
|                          |                     | (533.78~519.24)                              | (466.29~449.69)                     |                         |
|                          | Male                | $704.55 \pm 11.28$                           | $617.11 \pm 7.54$                   | 12.41%                  |
|                          |                     | (715.83~693.27)                              | (625.31~610.23)                     |                         |
| 12                       | Female              | $799.89 \pm 10.21$                           | $703.74 \pm 5.43$                   | 12.02%                  |
|                          |                     | (807.43~792.35)                              | (709.17~698.31)                     |                         |
|                          | DJ3                 | $708.36 \pm 10.58$                           | $624.24 \pm 6.36$                   | 11.88%                  |
|                          |                     | (718.94~697.78)                              | (630.6~617.88)                      |                         |
|                          | J2                  | $311.11 \pm 4.96$                            | $269.79 \pm 4.61$                   | 13.23%                  |
|                          |                     | (316.07~306.15)                              | (274.40~265.18)                     |                         |
|                          | J3                  | $426.81 \pm 6.87$                            | $364.23 \pm 11.64$                  | 14.95%                  |
|                          |                     | (433.68~419.94)                              | (375.87~352.59)                     |                         |
| 12                       | J4                  | $526.69 \pm 8.80$                            | $445.70 \pm 8.85$                   | 15.35%                  |
|                          |                     | (535.49~517.89)                              | (454.55~436.85)                     |                         |
|                          | Male                | $704.15 \pm 8.87$                            | $585.92 \pm 9.06$                   | 16.84%                  |
|                          |                     | (713.02~695.28)                              | (594.98~576.86)                     |                         |
|                          | Female              | $799.40 \pm 9.89$                            | $655.61 \pm 6.36$                   | 18.04%                  |
|                          |                     | (809.29~789.51)                              | (661.97~649.25)                     |                         |
|                          | DJ3                 | $707.50 \pm 11.01$                           | $574.37 \pm 5.79$                   | 18.92%                  |
|                          |                     | (718.51~696.49)                              | (580.16~568.58)                     |                         |

Table S3. Statistical analysis of the RNA-seq data for each sample.

| Sample | Raw reads number | Clean reads number | Clean data rate<br>(%) | Reference gene ratio<br>(%) | Reference genome comparison ratio<br>(%) |
|--------|------------------|--------------------|------------------------|-----------------------------|------------------------------------------|
| J2     | 22,217,822       | 22,133,728         | 99.62                  | 71.27                       | 95.87                                    |
| J3     | 24,136,024       | 24,057,741         | 99.67                  | 75.77                       | 96.05                                    |
| J4     | 24,136,024       | 24,037,515         | 99.59                  | 76.96                       | 95.75                                    |
| DJ3    | 24,135,023       | 24,018,211         | 99.51                  | 75.94                       | 95.49                                    |
| Male   | 21,485,349       | 21,359,122         | 99.41                  | 76.86                       | 95.34                                    |
| Female | 24,137,113       | 23,960,379         | 99.26                  | 78.06                       | 95.63                                    |

Table S4. KEGG enrichment result (top 20) for genes only up-regulated in DJ3.

| KEGG A class       | KEGG B class                              | Pathway                                             | Pathway ID | Count |
|--------------------|-------------------------------------------|-----------------------------------------------------|------------|-------|
| Metabolism         | Global and overview maps                  | Metabolic pathways                                  | ko01100    | 79    |
| Metabolism         | Xenobiotics biodegradation and metabolism | Metabolism of xenobiotics by cytochrome P450        | ko00980    | 20    |
| Metabolism         | Xenobiotics biodegradation and metabolism | Drug metabolism - cytochrome P450                   | ko00982    | 17    |
| Human Diseases     | Cancer: overview                          | Chemical carcinogenesis - DNA adducts               | ko05204    | 15    |
| Metabolism         | Carbohydrate metabolism                   | Pyruvate metabolism                                 | ko00620    | 12    |
| Metabolism         | Xenobiotics biodegradation and metabolism | Drug metabolism - other enzymes                     | ko00983    | 18    |
| Metabolism         | Carbohydrate metabolism                   | Glycolysis / Gluconeogenesis                        | ko00010    | 12    |
| Human Diseases     | Cancer: overview                          | Chemical carcinogenesis - reactive oxygen species   | ko05208    | 18    |
| Metabolism         | Carbohydrate metabolism                   | Glyoxylate and dicarboxylate metabolism             | ko00630    | 7     |
| Metabolism         | Carbohydrate metabolism                   | Propanoate metabolism                               | ko00640    | 7     |
| Metabolism         | Metabolism of cofactors and vitamins      | Ubiquinone and other terpenoid-quinone biosynthesis | ko00130    | 6     |
| Human Diseases     | Cancer: overview                          | Chemical carcinogenesis - receptor activation       | ko05207    | 15    |
| Metabolism         | Metabolism of other amino acids           | Glutathione metabolism                              | ko00480    | 10    |
| Human Diseases     | Cardiovascular disease                    | Fluid shear stress and atherosclerosis              | ko05418    | 12    |
| Metabolism         | Global and overview maps                  | Carbon metabolism                                   | ko01200    | 12    |
| Human Diseases     | Drug resistance: antineoplastic           | Platinum drug resistance                            | ko01524    | 9     |
| Organismal Systems | Aging                                     | Longevity regulating pathway - worm                 | ko04212    | 10    |
| Human Diseases     | Cancer: specific types                    | Hepatocellular carcinoma                            | ko05225    | 11    |
| Metabolism         | Carbohydrate metabolism                   | Fructose and mannose metabolism                     | ko00051    | 6     |
| Cellular Processes | Transport and catabolism                  | Lysosome                                            | ko04142    | 20    |

Table S5. KEGG enrichment result (top 20) for genes only down-regulated in DJ3.

| KEGG A class                            | KEGG B class                     | Pathway                                                     | Pathway ID | Count |
|-----------------------------------------|----------------------------------|-------------------------------------------------------------|------------|-------|
| Organismal Systems                      | Endocrine system                 | Renin-angiotensin system                                    | ko04614    | 5     |
| Organismal Systems                      | Immune system                    | Hematopoietic cell lineage                                  | ko04640    | 3     |
| Cellular Processes                      | Cell growth and death            | Apoptosis                                                   | ko04210    | 2     |
| Cellular Processes                      | Cell growth and death            | Cellular senescence                                         | ko04218    | 1     |
| Cellular Processes                      | Cellular community<br>eukaryotes | Adherens junction                                           | ko04520    | 1     |
| Cellular Processes                      | Cellular community<br>eukaryotes | Focal adhesion                                              | ko04510    | 2     |
| Cellular Processes                      | Cellular community<br>eukaryotes | Signaling pathways regulating<br>pluripotency of stem cells | ko04550    | 2     |
| Cellular Processes                      | Transport and catabolism         | Lysosome                                                    | ko04142    | 5     |
| Environmental Information<br>Processing | Membrane transport               | ABC transporters                                            | ko02010    | 1     |
| Environmental Information<br>Processing | Signal transduction              | AMPK signaling pathway                                      | ko04152    | 1     |
| Environmental Information<br>Processing | Signal transduction              | Apelin signaling pathway                                    | ko04371    | 2     |
| Environmental Information<br>Processing | Signal transduction              | Calcium signaling pathway                                   | ko04020    | 1     |
| Environmental Information<br>Processing | Signal transduction              | ErbB signaling pathway                                      | ko04012    | 1     |
| Environmental Information<br>Processing | Signal transduction              | FoxO signaling pathway                                      | ko04068    | 1     |
| Environmental Information<br>Processing | Signal transduction              | HIF-1 signaling pathway                                     | ko04066    | 1     |
| Environmental Information<br>Processing | Signal transduction              | Hippo signaling pathway                                     | ko04390    | 1     |
| Environmental Information<br>Processing | Signal transduction              | Hippo signaling pathway - fly                               | ko04391    | 1     |
| Environmental Information<br>Processing | Signal transduction              | JAK-STAT signaling pathway                                  | ko04630    | 1     |
| Environmental Information<br>Processing | Signal transduction              | MAPK signaling pathway                                      | ko04010    | 1     |
| Environmental Information<br>Processing | Signal transduction              | Phospholipase D signaling pathway                           | ko04072    | 2     |

Table S6. The candidate genes.

| Gene ID       | Name         | Homologous protein<br>GenBank ID | Blast nr                                                                          | p-value  |
|---------------|--------------|----------------------------------|-----------------------------------------------------------------------------------|----------|
| BXY_0417300.1 | <i>ADH</i>   | XP_013031846.1                   | PREDICTED: alcohol dehydrogenase [NADP (+)] [ <i>Anser cygnoides domesticus</i> ] | 4.67E-08 |
| BXY_1767700.1 | <i>ADH1</i>  | NP_505991.1                      | Alcohol dehydrogenase 1 [ <i>Caenorhabditis elegans</i> ]                         | 4.34E-96 |
| BXY_0267600.1 | <i>ALDH</i>  | KHN86680.1                       | Aldehyde dehydrogenase, mitochondrial [ <i>Toxocara canis</i> ]                   | 0        |
| BXY_1014500.1 | <i>Ma</i>    | NP_503306.1                      | Malate synthase [ <i>Caenorhabditis elegans</i> ]                                 | 0        |
| BXY_1230200.1 | <i>ACSS2</i> | XP_001900923.1                   | acetyl-Coenzyme A synthetase 2 [ <i>Brugia malayi</i> ]                           | 8.19E-73 |
| BXY_0461400.1 | <i>Ace</i>   | ERG80270.1                       | acetyl-coenzyme a cytoplasmic [ <i>Ascaris suum</i> ]                             | 4.11E-53 |
| BXY_1230100.1 | <i>ACS</i>   | EJW73448.1                       | acetyl-CoA synthetase [ <i>Wuchereria bancrofti</i> ]                             | 3.02E-23 |
| BXY_1369600.1 | <i>CoA</i>   | KJH44216.1                       | acetate--CoA ligase [ <i>Dictyocaulus viviparus</i> ]                             | 1.21E-75 |
| BXY_1487400.1 | <i>pod-2</i> | KKA67036.1                       | pod-2 [ <i>Pristionchus pacificus</i> ]                                           | 4.27E-14 |
| BXY_0702500.1 | <i>ADHs</i>  | CEF69673.1                       | Alcohol dehydrogenase [NADP (+)] [ <i>Strongyloides ratti</i> ]                   | 1.10E-39 |
| BXY_0417800.1 | <i>AKRS</i>  | XP_013302589.1                   | oxidoreductase, aldo/keto reductase family protein [ <i>Necator americanus</i> ]  | 5.08E-31 |
| BXY_0357600.1 | <i>AKT-1</i> | AFY98834.1                       | AKT-1 protein [ <i>Bursaphelenchus xylophilus</i> ]                               | 0        |

Table S7. RT-qPCR results of selected genes.

| Gene ID       | Name                                  | log <sub>2</sub> (DJ3/J2) | log <sub>2</sub> (DJ3/J3) | log <sub>2</sub> (DJ3/J4) | log <sub>2</sub> (DJ3/Male) | log <sub>2</sub> (DJ3/Female) |
|---------------|---------------------------------------|---------------------------|---------------------------|---------------------------|-----------------------------|-------------------------------|
|               |                                       | J2                        | J3                        | J4                        | Male                        | Female                        |
| BXY_1230200.1 | <i>acetyl-coenzyme a synthetase 2</i> | 3.68736689                | 3.395723315               | 2.684630396               | 3.524224974                 | 2.474998838                   |
| BXY_0461400.1 | <i>acetyl-coenzyme a cytoplasmic</i>  | 4.392913146               | 3.592917275               | 3.047902283               | 3.22473448                  | 2.260173296                   |
| BXY_1369600.1 | <i>acetate--CoA ligase</i>            | 3.887966216               | 3.510710329               | 3.035982446               | 3.454341566                 | 2.483059608                   |
| BXY_0357600.1 | <i>AKT-1 protein</i>                  | -1.689187711              | -1.054706796              | -1.586709928              | -1.183289552                | -1.028565343                  |



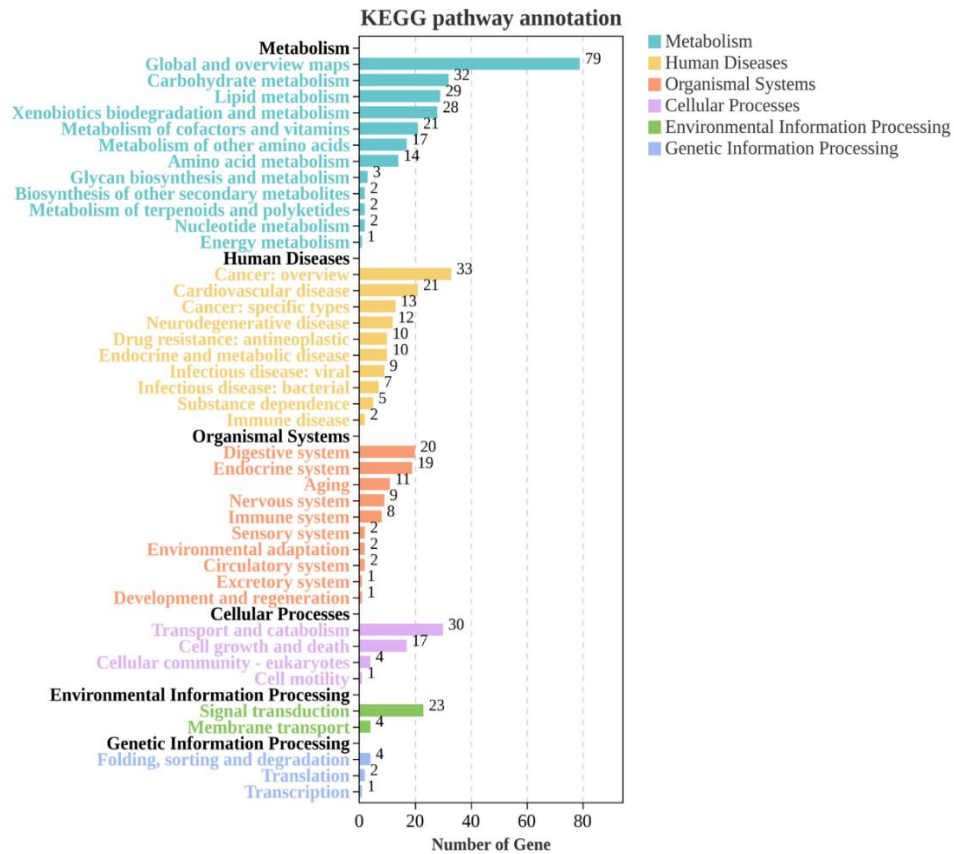

Figure S1. KEGG enrichment result of genes only up-regulated in DJ3.

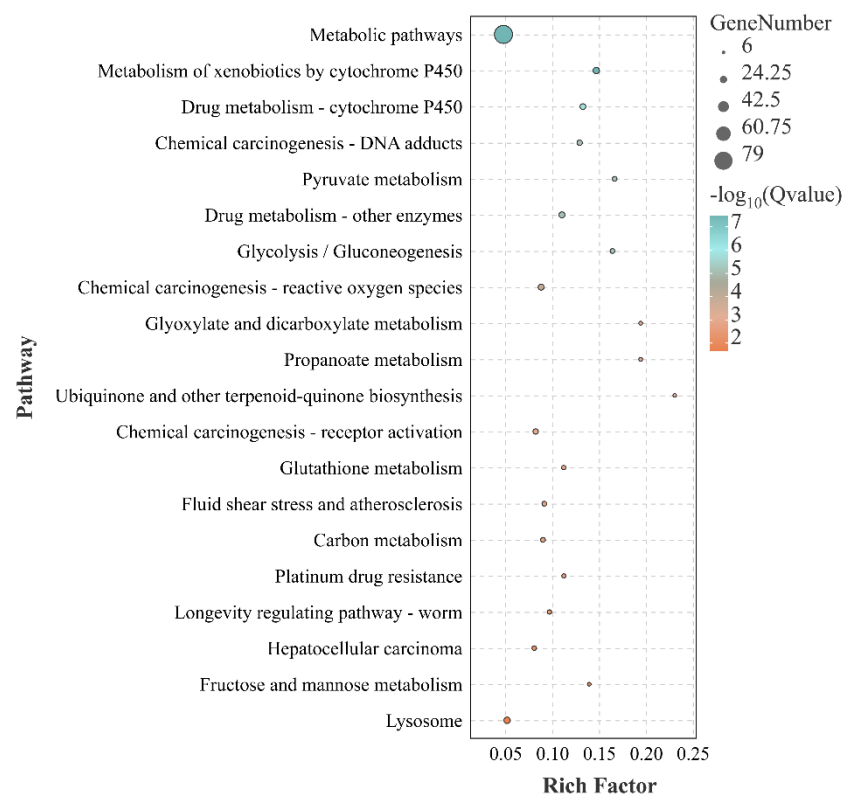

Figure S2. KEGG enrichment result (top 20) for genes only up-regulated in DJ3.

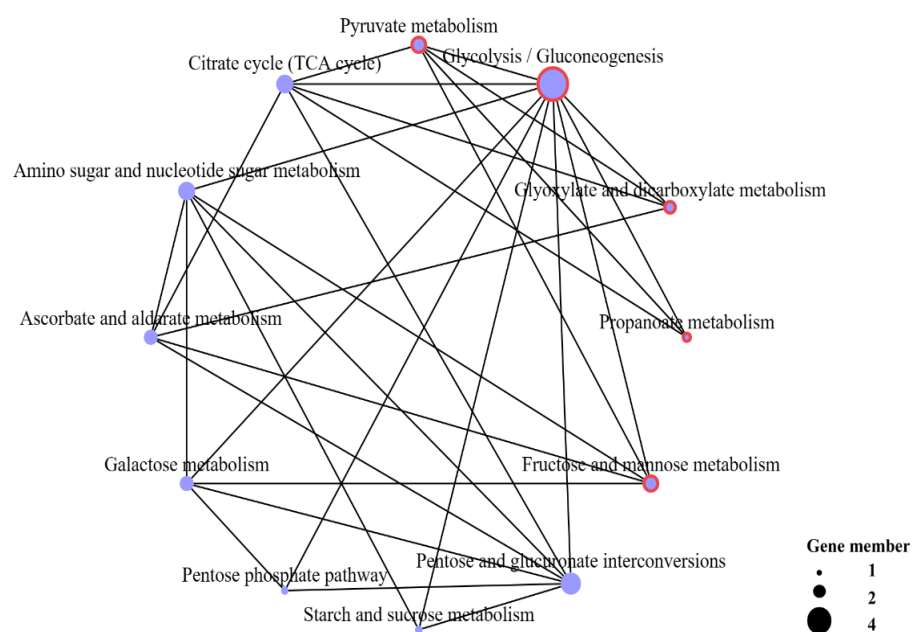

Figure S3. The network diagram of carbohydrate metabolism pathways.  
Red marked as selected pathways.

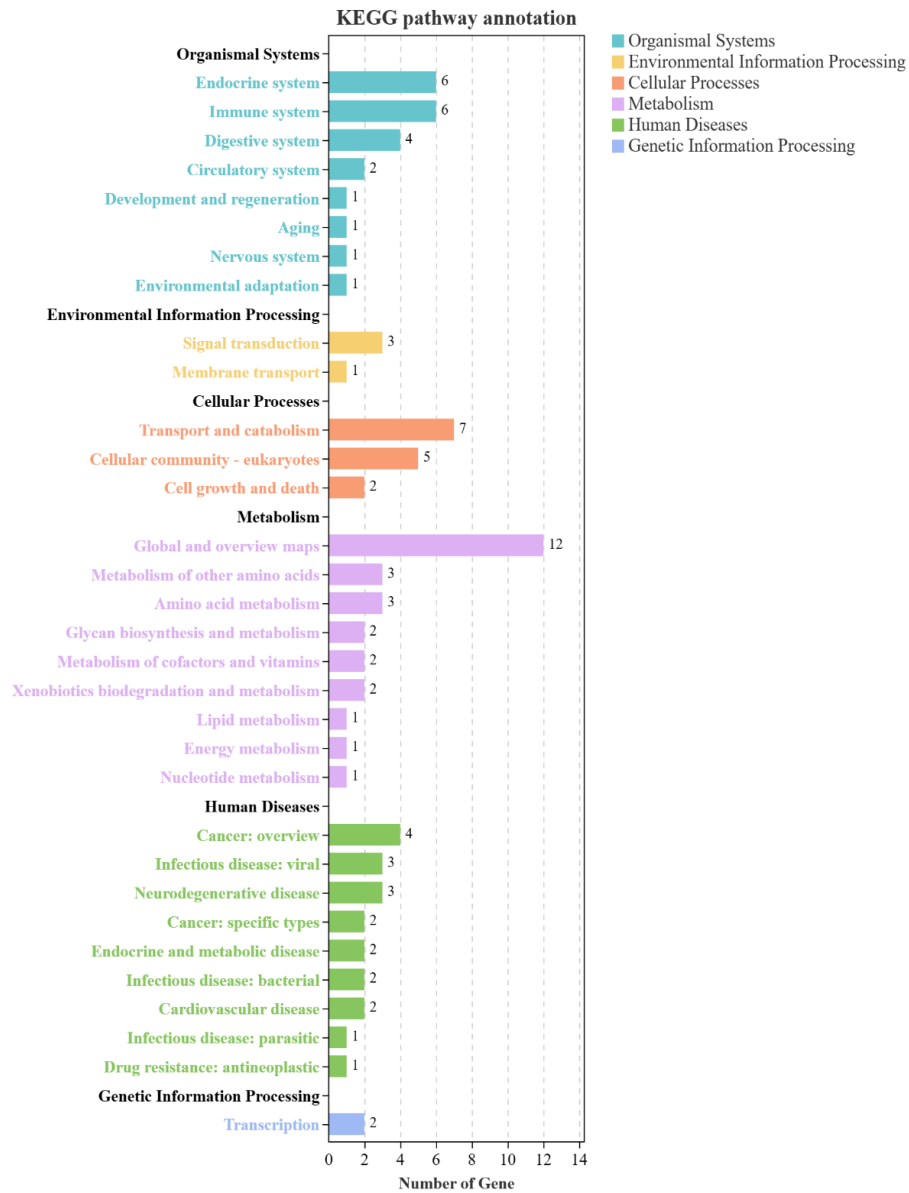

Figure S4. KEGG enrichment result of genes only down-regulated in DJ3.

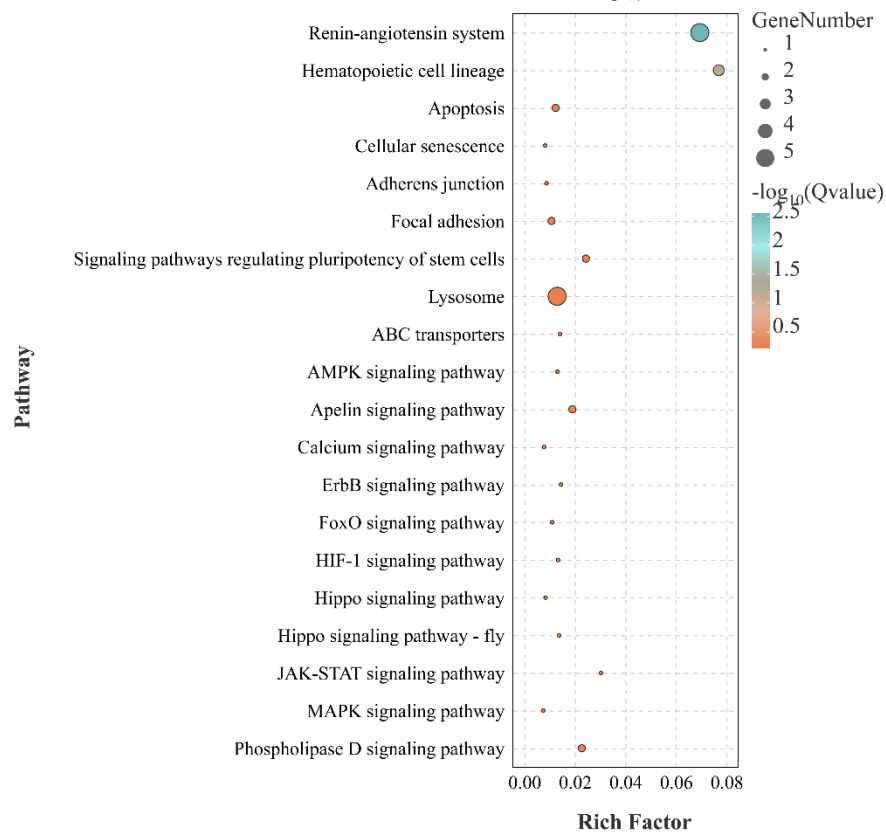

Figure S5. KEGG enrichment result (top 20) for genes only down-regulated in DJ3.

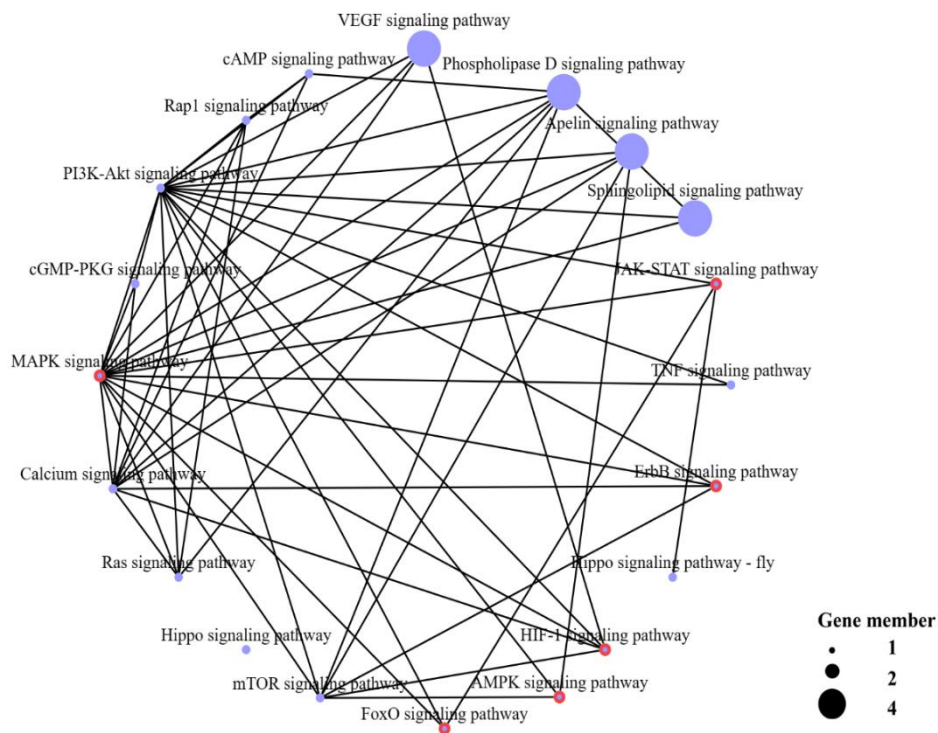

Figure S6. The network diagram of signal transduction pathways.  
Red marked as selected pathways.
